# Supplementary material
Source: publisher site journal article supplement (https://www.dovepress.com/article/604537)
Supplement: Supplementary file 1 [file 604537%20Revised%20supplementary%20materials_1.docx]

Supplementary Material: Results and Data Collection

This supplementary file contains expanded results and data collection details for a retrospective longitudinal observational study of patients with inherited bleeding disorders (IBDs) recruited from the Pediatric Hematology Unit, Cairo University Children's Hospital, and the pediatric clinic at Misr University for Science and Technology. Eligible patients were diagnosed and followed during the period from 2015 to 2025 (10 years).

Data were retrieved by reviewing medical records and, when needed, by directly interviewing patients and their legal guardians.

Two hundred ninety-five records were reviewed; 45 were excluded because of inadequate data and 50 were excluded because they were lost to follow-up, leaving 200 eligible patients for the study.

In all supplementary tables, bold text denotes major category or subgroup headings.

All demographic, clinical, investigations, treatment data and outcomes were reported.

1. Descriptive Data:

Supplementary Table S1 illustrates the distribution of inherited coagulation disorders among the patients studied showing that Hemophilia A was the most prevalent diagnosis, accounting for nearly half of the cases (49.6%). Hemophilia A patients were further classified according to severity into: severe cases accounting for 53.1% (Factor levels < 1%), moderate cases 29.7% (Factor levels 1%-5%), and mild cases 17.2% (Factor levels: 5%-30%). Fibrinogen disorders collectively represented a significant portion (19.4%), with afibrinogenemia (14.7%) being more common than hypofibrinogenemia (4.7%). Hemophilia B constituted 12.4% of the cases, classified into severe (56.25%), moderate (31.25%), and mild (12.5%) based on factors levels same as hemophilia A.

Hemophilia B was followed by Factor VII deficiency at 11.6% in frequency. The remaining 7% comprised various rare coagulation disorders, including deficiencies in Factors V, X, XI, XII, and XIII, each representing a small fraction of the total cohort.

# Supplementary Table S1: Distribution of the studied patients with inherited coagulation disorders according to coagulation defect (n = 129)

| **Diagnosis** | **No.** | **%** |
| --- | --- | --- |
| 1. **Hemophilia A**  Severe  Moderate  Mild | 64  34  19  11 | 49.6  53.1  29.7  17.2 |
| 2. **Fibrinogen disorders** | **25** | **19.4** |
| (a) Afibrinogenemia | 19 | 14.7 |
| (b) Hypofibrinogenemia | 6 | 4.7 |
| 3. **Hemophilia B**  Severe  Moderate  Mild | 16  9  5  2 | 12.4  56.25  31.25  12.5 |
| 4. **Factor VII deficiency** | 15 | 11.6 |
| 5. **Other Rare Coagulation** | **9** | **7.0** |
| (a) Factor V deficiency | 2 | 1.6 |
| (b) Factor X deficiency | 3 | 2.3 |
| (c) Factor XI deficiency | 2 | 1.6 |
| (d) Factor XII deficiency | 1 | 0.8 |
| (e) Factor XIII deficiency | 1 | 0.8 |

Supplementary Table S2 shows the demographic data of patients with inherited coagulation disorders. The demographic analysis revealed fundamental differences in inheritance patterns among bleeding disorders. There was complete male predominance in hemophilia A and B (100%), contrasting sharply with the mixed gender distribution in fibrinogen disorders (52% male) and Factor VII deficiency (33.3% male). High consanguinity rates were observed in fibrinogen disorders (60.0%) followed by hemophilia (40.6-43.8%) and Factor VII deficiency (26.7%).

The age distribution across all groups was relatively similar, with mean ages ranging from approximately 6.27 to 7.39 years. The youngest patients were observed in the Hemophilia A and B groups, starting at 0.80 years, while fibrinogen disorders and Factor VII deficiency had slightly older minimum ages.

The majority of patients across all groups resided in Giza and Cairo, with Giza accounting for the highest proportion in most categories, particularly in rare coagulation disorders (66.7%). Other governorates contributed fewer cases, with some areas like Menoufia, Minya, Qalioubeya, Fayoum, and Sharkeya showing variable representation across specific disorders.

Governorate of origin closely mirrored the residence patterns, with Giza and Cairo again being the most common origins across all disorders. Giza was the origin for the highest percentage of rare coagulation cases (55.6%), while other regions like Qalioubeya, Minya, and Fayoum showed notable representation in certain disorders, particularly fibrinogen disorders.

A positive family history of a similar condition was reported in a substantial proportion of patients, especially among those with Hemophilia A (59.4%), fibrinogen disorders (56.0%), and rare coagulation disorders (55.6%). The proportion was somewhat lower in Hemophilia B (43.8%) and Factor VII deficiency (40.0%). Regarding a family history of bleeding, Hemophilia A again showed the highest percentage (59.4%), followed by fibrinogen disorders (56.0%), while other groups ranged between 40.0% and 55.6%. Brothers were the most frequently affected family members across all groups, particularly in Hemophilia A (42.2%), while other relatives such as uncles, sisters, mothers, fathers, and aunts were less commonly affected, with varying distributions depending on the specific disorder.

# Supplementary Table S2: Demographic data of patients with Inherited Coagulation Disorders ( n= 129)

|  | **Diagnosis** | | | | | | | | | | |
| --- | --- | --- | --- | --- | --- | --- | --- | --- | --- | --- | --- |
| **Hemophilia A (n = 64)** | | **Hemophilia B (n = 16)** | | **Fibrinogen disorders**  **(n = 25)** | | | **Factor VII deficiency**  **(n = 15)** | | **Rare**  **Coagulation (n = 9)** | |
| **No.** | **%** | **No.** | **%** | **No.** | | **%** | **No.** | **%** | **No.** | **%** |
| **Sex** Male | 64 | 100.0 | 16 | 100.0 | 13 | | 52.0 | 5 | 33.3 | 4 | 44.4 |
| Female | 0 | 0.0 | 0 | 0.0 | 12 | | 48.0 | 10 | 66.7 | 5 | 55.6 |
| **Age (years)** Min. – Max. | 0.80 – 17.0 | | 0.80 – 11.0 | | 1.50 – 12.0 | | | 3.0 – 11.0 | | 1.50 – 12.0 | |
| Mean ± SD. | 6.86 ± 3.56 | | 6.49 ± 3.04 | | 6.30 ± 3.74 | | | 6.27 ± 2.66 | | 7.39 ± 3.04 | |
| Median (IQR) | 7.0 (4.0 – 9.0) | | 6.0(5.0 – 9.50) | | 5.0 (3.0 – 9.0) | | | 5.0 (4.0 – 8.0) | | 8.0 (7.0 – 9.0) | |
| **Residence** Cairo | 23 | 35.9 | 5 | 31.3 | 9 | | 36.0 | 5 | 33.3 | 1 | 11.1 |
| Giza | 28 | 43.8 | 8 | 50.0 | 4 | | 16.0 | 7 | 46.7 | 6 | 66.7 |
| Menoufia | 1 | 1.6 | 0 | 0.0 | 0 | | 0.0 | 2 | 13.3 | 0 | 0.0 |
| Qena | 3 | 4.7 | 1 | 6.3 | 0 | | 0.0 | 0 | 0.0 | 0 | 0.0 |
| Minya | 1 | 1.6 | 1 | 6.3 | 2 | | 8.0 | 0 | 0.0 | 0 | 0.0 |
| Qalioubeya | 1 | 1.6 | 0 | 0.0 | 6 | | 24.0 | 0 | 0.0 | 0 | 0.0 |
| Assiut | 0 | 0.0 | 0 | 0.0 | 0 | | 0.0 | 0 | 0.0 | 1 | 11.1 |
| Sharkeya | 0 | 0.0 | 0 | 0.0 | 1 | | 4.0 | 0 | 0.0 | 0 | 0.0 |
| Fayoum | 2 | 3.1 | 0 | 0.0 | 3 | | 12.0 | 0 | 0.0 | 0 | 0.0 |
| Gharbia | 2 | 3.1 | 0 | 0.0 | 0 | | 0.0 | 0 | 0.0 | 0 | 0.0 |
| Dakahlia | 1 | 1.6 | 0 | 0.0 | 0 | | 0.0 | 0 | 0.0 | 1 | 11.1 |
| Red sea | 0 | 0.0 | 0 | 0.0 | 0 | | 0.0 | 1 | 6.7 | 0 | 0.0 |
| Kafr El-Sheikh | 1 | 1.6 | 0 | 0.0 | 0 | | 0.0 | 0 | 0.0 | 0 | 0.0 |
| Suez | 1 | 1.6 | 1 | 6.3 | 0 | | 0.0 | 0 | 0.0 | 0 | 0.0 |
| **Governorate origin** Cairo | 13 | 20.3 | 2 | 12.5 | 4 | | 16.0 | 4 | 26.7 | 0 | .0 |
| Giza | 18 | 28.1 | 5 | 31.3 | 4 | | 16.0 | 5 | 33.3 | 5 | 55.6 |
| Menoufia | 3 | 4.7 | 0 | 0.0 | 1 | | 4.0 | 2 | 13.3 | 0 | 0.0 |
| Qena | 3 | 4.7 | 1 | 6.3 | 0 | | 0.0 | 0 | 0.0 | 0 | 0.0 |
| Minya | 5 | 7.8 | 3 | 18.8 | 2 | | 8.0 | 0 | 0.0 | 0 | 0.0 |
| Qalioubeya | 2 | 3.1 | 0 | 0.0 | 7 | | 28.0 | 0 | 0.0 | 0 | 0.0 |
| Assiut | 3 | 4.7 | 0 | 0.0 | 0 | | 0.0 | 0 | .0 | 1 | 11.1 |
| Sharkeya | 1 | 1.6 | 2 | 12.5 | 2 | | 8.0 | 1 | 6.7 | 0 | 0.0 |
| Fayoum | 3 | 4.7 | 1 | 6.3 | 3 | | 12.0 | 0 | .0 | 1 | 11.1 |
| Behera | 0 | 0.0 | 1 | 6.3 | 0 | | 0.0 | 0 | 0.0 | 0 | 0.0 |
| Gharbia | 3 | 4.7 | 0 | 0.0 | 1 | | 4.0 | 0 | 0.0 | 0 | 0.0 |
| Beni-Suef | 1 | 1.6 | 0 | 0.0 | 0 | | 0.0 | 0 | .0 | 1 | 11.1 |
| Dakahlia | 2 | 3.1 | 0 | 0.0 | 0 | | 0.0 | 0 | .0 | 1 | 11.1 |
| Aswan | 1 | 1.6 | 0 | 0.0 | 0 | | 0.0 | 1 | 6.7 | 0 | 0.0 |
| Kafr El-Sheikh | 1 | 1.6 | 0 | 0.0 | 0 | | 0.0 | 1 | 6.7 | 0 | 0.0 |
| Red sea | 0 | 0.0 | 0 | 0.0 | 0 | | 0.0 | 1 | 6.7 | 0 | 0.0 |
| Alexandria | 1 | 1.6 | 0 | 0.0 | 0 | | 0.0 | 0 | 0.0 | 0 | 0.0 |
| Sohag | 2 | 3.1 | 0 | 0.0 | 1 | | 4.0 | 0 | 0.0 | 0 | 0.0 |
| Suez | 2 | 3.1 | 1 | 6.3 | 0 |  | 0.0 | 0 | 0.0 | 0 | 0.0 |
| **Consanguinity**  Negative | 38 | 59.4 | 9 | 56.3 | 10 |  | 40.0 | 11 | 73.3 | 4 | 44.4 |
| Positive | 26 | 40.6 | 7 | 43.8 | 15 |  | 60.0 | 4 | 26.7 | 5 | 55.6 |

| **Family History of similar condition** | 38 | 59.4 | 7 | 43.8 | 14 | 56.0 | 6 | 40.0 | 5 | 55.6 |
| --- | --- | --- | --- | --- | --- | --- | --- | --- | --- | --- |
| **Family History of Bleeding** | 38 | 59.4 | 7 | 43.8 | 14 | 56.0 | 6 | 40.0 | 5 | 55.6 |
| **Affected Family Member** |  |  |  |  |  |  |  |  |  |  |
| Father  Mother  Brother  Sister  Uncle  Aunt | 1  5  27  2  10  1 | 1.6  7.8  42.2  3.1  15.6  1.6 | 2  0  2  1  2  0 | 12.5  0.0  12.5  6.3  12.5  0.0 | 0  1  7  2  2  2 | 0.0  4.0  28.0  8.0  8.0  8.0 | 1  1  1  1  3  0 | 6.7  6.7  6.7  6.7  20.0  0.0 | 1  0  1  2  1  0 | 11.1  0.0  11.1  22.2  11.1  0.0 |

IQR: Inter quartile range SD: Standard deviation

Supplementary Table S3 shows clinical data at initial presentation. Among patients with inherited coagulation disorders, the most common initial bleeding site varied a lot. Skin was the predominant site in fibrinogen disorders (60%), while mucous membranes (MM) were most frequent in Hemophilia A (67.2%), Factor VII deficiency (53.3%) and rare coagulation disorders (44.4%). Circumcision-related bleeding was common in Hemophilia A (42.2%) but much less frequent in other groups. Umbilical stump bleeding was high in fibrinogen disorders (44.0%). Epistaxis was frequent in Factor VII deficiency (46.7%) and Hemophilia B (25.0%). Organ bleeding occurred most frequently in Factor VII deficiency (26.7%). Other bleeding sites such as gum, puncture sites, and musculoskeletal involvement showed variable distributions across the groups.

Patients with Hemophilia A experienced their first bleeding episode earliest, with a median age of 1.0 month. In contrast, patients with Hemophilia B, fibrinogen disorders, Factor VII deficiency, and rare coagulation disorders presented at later ages, with median ages of 15.0, 12.0, 12.0, and 12.0 months respectively. The wide range of ages at first presentation in patients with hemophilia A , fibrinogen disorders and rare coagulopathies, ended in having standard deviations higher than the mean values, which suggests that some age values are extreme relative to the central values .

Hemophilia A was diagnosed at the youngest median age (0.50 years). The other disorders were diagnosed later, with median ages ranging from 1.0 to 2.0 years.

The mean duration of disease was longest in Hemophilia A patients (6.13 years), consistent with earlier onset and diagnosis. Other disorders showed shorter mean durations ranging from 4.07 to 5.12 years.

# Supplementary Table S3: Clinical data of patients with inherited coagulation disorders at initial presentation (n=129)

|  | | | | **Diagnosis** | | | | | | | | | |
| --- | --- | --- | --- | --- | --- | --- | --- | --- | --- | --- | --- | --- | --- |
| **Hemophilia A (n = 64)** | | **Hemophilia B (n = 16)** | | **Fibrinogen disorders**  **(n = 25)** | | **Factor 7 deficiency**  **(n = 15)** | | **Rare**  **Coagulation (n = 9)** | |
| **No.** | **%** | **No.** | **%** | **No.** | **%** | **No.** | **%** | **No.** | **%** |
| **Site of first** | |  | | **43** | **67.2** | **6** | **37.5** | **5** | **20.0** | **8** | **53.3** | **4** | **44.4** |
| **bleeding attack:** | | | |
| **MM** | | | |
| Gum bleeding | | | | 10 | 15.6 | 0 | 0.0 | 1 | 4.0 | 1 | 6.7 | 2 | 22.2 |
| Epistaxis | | | | 6 | 9.4 | 4 | 25.0 | 2 | 8.0 | 7 | 46.7 | 1 | 11.1 |
| Circumcision | | | | 27 | 42.2 | 1 | 6.3 | 2 | 8.0 | 0 | 0.0 | 1 | 11.1 |
| Subconjunctival hemorrhage | | | | 0 | 0.0 | 1 | 6.3 | 0 | 0.0 | 0 | 0.0 | 0 | 0.0 |
| **Skin** | | | | **19** | **29.6** | **6** | **37.5** | **15** | **60.0** | **3** | **20.0** | **3** | **33.3** |
| Puncture site | | | | 4 | 6.3 | 1 | 6.3 | 2 | 8.0 | 0 | 0.0 | 1 | 11.1 |
| Easy bruising | | | | 4 | 6.3 | 4 | 25.0 | 2 | 8.0 | 2 | 13.3 | 1 | 11.1 |
| Umbilical stump | | | | 11 | 17.2 | 1 | 6.3 | 11 | 44.0 | 0 | 0.0 | 1 | 11.1 |
| Eyelid wound | | | | 0 | 0.0 | 0 | 0.0 | 0 | 0.0 | 1 | 6.7 | 0 | 0.0 |
| **Organ** | | | | **1** | **1.6** | **3** | **18.8** | **5** | **20.0** | **4** | **26.7** | **1** | **11.1** |
| Rectal | | | | 1 | 1.6 | 0 | 0.0 | 0 | 0.0 | 1 | 6.7 | 0 | 0.0 |
| Hematemesis | | | | 0 | 0.0 | 2 | 12.5 | 1 | 4.0 | 1 | 6.7 | 1 | 11.1 |
| Hematuria | | | | 0 | 0.0 | 1 | 6.3 | 2 | 8.0 | 0 | 0.0 | 0 | 0.0 |
| Intracranial hemorrhage | | | | 0 | 0.0 | 0 | 0.0 | 1 | 4.0 | 1 | 6.7 | 0 | 0.0 |
| Vaginal | | | | 0 | 0.0 | 0 | 0.0 | 0 | 0.0 | 1 | 6.7 | 0 | 0.0 |
| Retinal | | | | 0 | 0.0 | 0 | 0.0 | 1 | 4.0 | 0 | 0.0 | 0 | 0.0 |
| **Musculoskeletal** | | | | **1** | **1.6** | **1** | **6.3** | **0** | **0.0** | **00** | **0.0** | **1** | **11.1** |
| Hemarthrosis | | | | 1 | 1.6 | 0 | 0.0 | 0 | 0.0 | 0 | 0.0 | 0 | 0.0 |
| Muscle | | | | 0 | 0.0 | 1 | 6.3 | 0 | 0.0 | 0 | 0.0 | 1 | 11.1 |
| **Age at first** | |  | | 0.0 – 60.0 | | 0.0 – 84.0 | | 0.0 – 60.0 | | 4.0 – 72.0 | | 0.0 – 72.0 | |
| **bleeding attack** | | |  |
| **(months)** | Max. | |
| Min. – |
| Mean ± SD. | | | | 7.5 ± 12.0 | | 23.4 ± 23.5 | | 7.9 ± 12.0 | | 26.40 ± 26.24 | | 26.3 ± 28.2 | |
| Median (IQR)  **Age at first bleeding attack according to age groups n (%):**  **< 1 year old**  **1-6 years old**  **7-12 years old**  **12-18 years old** | | | | 1. (0.0 - 12.0)   49 (76.6)  15 (23.4%)  0  0 | | 15.0 (7.6 – 39.2)  7 (43.8)  9 (56.2)  0  0 | | 12.0 (0.0 - 16.0)  16 (64%)  9 (36%)  0  0 | | 12.0 (8.7 – 44.1)  8 (53.3)  7 (46.7)  0  0 | | 12.0 (7.3 – 45.3)  2 (22.2)  7 (77.8)  0  0 | |
| **Age at diagnosis** | | | |  | |  | |  | |  | |  | |
| **(years)**  Min. – Max. | | | | 0.08 – 10.0 | | 0.16 – 9.0 | | 0.08 – 12.0 | | 0.75 – 7.0 | | 0.50 – 7.0 | |
| Mean ± SD. | | | | 1.28 ± 1.98 | | 2.46 ± 2.34 | | 2.17 ± 2.64 | | 2.92 ± 2.16 | | 2.78 ± 2.35 | |
| Median (IQR) | | | | 0.50 (0.12 – 2.0) | | 1.50 (1.0 – 3.50) | | 1.0 (1.0 – 2.0) | | 2.0 (1.0 – 4.50) | | 2.0 (1.0 – 4.0) | |
| **Duration of the disease (years)**  Min. – Max. | | | | 0.50 – 14.0 | | 0.50 – 11.0 | | 0.50 – 12.0 | | 2.0 – 9.0 | | 0.50 – 11.0 | |
| Mean ± SD. | | | | 6.13 ± 3.49 | | 4.47 ± 3.01 | | 5.12 ± 3.70 | | 4.07 ± 2.34 | | 4.83 ± 3.34 | |
| Median (IQR) | | | | 6.0 (4.0 – 8.0) | | 4.0 (2.0 – 6.0) | | 4.0 (2.0 – 8.0) | | 3.0 (2.0 – 5.5) | | 6.0 (2.0 – 6.0) | |

# IQR: Inter quartile range SD: Standard deviation

Supplementary Table S4 shows the longitudinal follow up clinical data of patients with inherited coagulation disorders. The highest mean hospitalization frequency was observed in Hemophilia A patients (5.98 admissions per year), reflecting the severity of bleeding in this group. Other groups showed lower hospitalization rates, with means ranging from 3.88 to 4.36 admissions per year in rare coagulation disorders, fibrinogen disorders, and Factor VII deficiency.

The most frequent causes of hospitalization included muscle hematoma and joint bleeds, particularly in Hemophilia A (78.1%,76.6%) and hemophilia B patients (62.5%,68.7%), joint bleeds, followed by easy bruising and epistaxis across several groups. Hematological emergencies like intracranial hemorrhage occurred in Hemophilia A, fibrinogen disorders, and rare coagulation disorders. Other bleeding manifestations such as gum bleeding, hematemesis, hematuria, and rectal bleeding were variably distributed across groups.

ICU admissions were mainly related to intracranial hemorrhage and circumcision-related complications, with Hemophilia A accounting for the majority of ICU admissions. Umbilical stump bleeding also led to ICU admissions in some fibrinogen and rare coagulation disorder cases.

Systemic comorbidities were infrequent but varied across the groups. Bronchial asthma, allergic rhinitis, and glucose-6-phosphate dehydrogenase (G6PD) deficiency were only reported in Hemophilia A. Autoimmune and gastrointestinal diseases (Crohn's disease, ulcerative colitis, celiac disease) were noted among Factor VII deficiency patients.

Aortic regurge, liver failure, renal disease, and rare conditions such as left vitreous fibrosis were reported sporadically in individual patients.

Circumcision was the most common surgical procedure across all groups, especially in Hemophilia A (82.8%) and Hemophilia B (87.5%). Other surgeries, such as adenoidectomy, tonsillectomy, GI endoscopy, intracranial hemorrhage evacuation, and vitreous hemorrhage evacuation, were performed in smaller numbers across the groups, usually related to bleeding or complications.

General bruising was most frequent in Hemophilia A (46.9%) and observed to a lesser extent in other groups. Pallor was noted variably, particularly in rare coagulation disorders (22.2%). Splenomegaly and hepatomegaly were rare findings. Delayed motor and mental development were occasionally seen in fibrinogen disorders and Factor VII deficiency. Rare findings like cheek hematoma, eye ecchymosis, and failure to thrive were reported in isolated cases.

Supplementary Table S4: The longitudinal follow up clinical data of patients with inherited coagulation disorders (n=129 )

|  | **Diagnosis** | | | | | | | | | |
| --- | --- | --- | --- | --- | --- | --- | --- | --- | --- | --- |
| **Hemophilia A (n = 64)** | | **Hemophilia B (n = 16)** | | **Fibrinogen disorders**  **(n = 25)** | | **Factor 7 deficiency**  **(n = 15)** | | **Rare**  **Coagulation (n = 9)** | |
| **No.** | **%** | **No.** | **%** | **No.** | **%** | **No.** | **%** | **No.** | **%** |
| **Frequency of hospitalization (Year)** | **(n = 63)** | | **(n = 12)** | | **(n = 22)** | |  | |  | |
| Min. – Max. | 2.0 – 10.0 | | 1.0 – 8.0 | | 1.0 – 9.0 | | 2.0 – 9.0 | | 0.0 – 10.0 | |
| Mean ± SD. | 5.98 ± 2.13 | | 4.0 ± 2.45 | | 4.18 ± 2.17 | | 4.36 ± 2.34 | | 3.88 ± 3.52 | |
| Median (IQR) | 6.0(4.0 – 8.0) | | 3.50(2.0–5.50) | | 4.0(2.0 – 5.0) | | 4.0(2.50 –5.50) | | 3.50(1.0 – 6.0) | |
| **Ward admission indications**  Gum bleeding | 11 | 17.2 | 1 | 6.3 | 1 | 4.0 | 1 | 6.7 | 1 | 11.1 |
| Epistaxis | 23 | 35.9 | 3 | 18.8 | 7 | 28.0 | 5 | 33.3 | 2 | 22.2 |
| Sub conjunctival | 0 | 0.0 | 0 | 0.0 | 2 | 8.0 | 0 | 0.0 | 0 | 0.0 |
| Circumcision (preoperative) | 2 | 3.2 | 0 | 0.0 | 0 | 0.0 | 0 | 0.0 | 0 | 0.0 |
| Bruising easily | 29 | 45.3 | 4 | 25.0 | 10 | 40.0 | 6 | 40.0 | 2 | 22.2 |
| Umbilical stump | 0 | 0.0 | 0 | 0.0 | 1 | 4.0 | 0 | 0.0 | 0 | 0.0 |
| Rectal | 1 | 1.6 | 0 | 0.0 | 0 | 0.0 | 2 | 13.3 | 1 | 11.1 |
| Hematemesis | 4 | 6.3 | 2 | 12.5 | 2 | 8.0 | 2 | 13.3 | 2 | 22.2 |
| Hematuria | 0 | 0.0 | 1 | 6.3 | 1 | 4.0 | 0 | 0.0 | 0 | 0.0 |
| Intracranial hemorrhage | 5 | 7.8 | 0 | 0.0 | 0 | 0.0 | 3 | 20 | 1 | 11.1 |
| Retinal hemorrhage | 0 | 0.0 | 0 | 0.0 | 0 | 0.0 | 0 | 0.0 | 1 | 11.1 |
| Joint bleeds | 49 | 76.6 | 10 | 62.5 | 3 | 12.0 | 3 | 20.0 | 2 | 22.2 |
| Post-operative | 0 | 0.0 | 2 | 12.5 | 0 | 0.0 | 0 | 0.0 | 1 | 11.1 |
| Sepsis  Muscle hematoma | 0  50 | 0.0  78.12 | 1  11 | 6.3  68.7 | 0  4 | 0.0  16.0 | 1  2 | 6.7  13.3 | 0  3 | 0.0  33.3 |
| **ICU admission indications** Circumcision (postoperative) | 4 | 6.3 | 0 | 0.0 | 1 | 4.2 | 0 | 0.0 | 0 | 0.0 |
| Umbilical stump | 4 | 6.3 | 0 | 0.0 | 1 | 4.2 | 0 | 0.0 | 1 | 11.1 |
| Hematemesis | 1 | 1.6 | 0 | 0.0 | 0 | 0.0 | 0 | 0.0 | 0 | 0.0 |
| Intracranial hemorrhage | 3 | 4.7 | 0 | 0.0 | 0 | 0.0 | 0 | 0.0 | 1 | 11.1 |
| **Systemic Illness** Bronchial asthma | 2 | 3.1 | 0 | 0.0 | 0 | 0.0 | 0 | 0.0 |  |  |
| Allergic rhinitis | 1 | 1.6 | 0 | 0.0 | 0 | 0.0 | 0 | 0.0 |  |  |
| G6PD | 2 | 3.1 | 0 | 0.0 | 0 | 0.0 | 1 | 6.7 |  |  |
| Crohn’s disease | 0 | 0.0 | 0 | 0.0 | 0 | 0.0 | 1 | 6.7 |  |  |
| Ulcerative colitis | 1 | 1.6 | 0 | 0.0 | 0 | 0.0 | 1 | 6.7 |  |  |
| Celiac disease | 1 | 1.6 | 0 | 0.0 | 0 | 0.0 | 0 | 0.0 |  |  |
| Aortic regurge | 0 | 0.0 | 0 | 0.0 | 1 | 4.0 | 0 | 0.0 |  |  |
| Liver cell failure | 1 | 1.6 | 0 | 0.0 | 0 | 0.0 | 0 | 0.0 |  |  |
| Vitreous fibrosis | 0 | 0.0 | 0 | 0.0 | 1 | 4.0 | 0 | 0.0 |  |  |
| Rickets | 0 | 0.0 | 1 | 6.3 | 0 | 0.0 | 0 | 0.0 |  |  |
| Renal disease | 0 | 0.0 | 1 | 6.3 | 0 | 0.0 | 0 | 0.0 |  |  |
| **Surgical history** Circumcision | 53 | 82.8 | 14 | 87.5 | 9 | 36.0 | 6 | 40.0 | 3 | 33.3 |
| Adenoidectomy | 1 | 1.6 | 0 | 0.0 | 0 | 0.0 | 0 | 0.0 | 0 | 0.0 |
| Tonsillectomy | 1 | 1.6 | 0 | 0.0 | 0 | 0.0 | 1 | 6.7 | 0 | 0.0 |
| GI endoscope | 2 | 3.1 | 1 | 6.3 | 1 | 4.0 | 0 | 0.0 | 0 | 0.0 |
| ICH evacuation | 3 | 4.7 | 0 | 0.0 | 0 | 0.0 | 1 | 6.7 | 0 | 0.0 |
| Intestinal obstruction bypass | 0 | 0.0 | 0 | 0.0 | 1 | 4.0 | 0 | 0.0 | 1 | 11.1 |
| Lipoma excision Surgical | 1 | 1.6 | 0 | 0.0 | 0 | 0.0 | 0 | 0.0 | 0 | 0.0 |
| Vitreous hemorrhage evacuation | 0 | 0.0 | 0 | 0.0 | 2 | 8.0 | 0 | 0.0 | 0 | 0.0 |
| **Systemic Examination** General bruising | 30 | 46.9 | 1 | 6.3 | 6 | 24.0 | 4 | 26.7 | 1 | 11.1 |
| Hepatomegaly | 1 | 1.6 | 0 | 0.0 | 0 | 0.0 | 0 | 0.0 | 0 | 0.0 |
| Splenomegaly | 1 | 1.6 | 0 | 0.0 | 0 | 0.0 | 1 | 6.7 | 0 | 0.0 |
| Delayed motor and mental skills | 0 | 0.0 | 0 | 0.0 | 1 | 4.0 | 1 | 6.7 | 0 | 0.0 |
| Pallor | 8 | 12.5 | 1 | 6.3 | 2 | 8.0 | 0 | 0.0 | 2 | 22.2 |
| Eye ecchymosis | 1 | 1.6 | 0 | 0.0 | 0 | 0.0 | 0 | 0.0 | 0 | 0.0 |
| Cheek hematoma | 1 | 1.6 | 0 | 0.0 | 0 | 0.0 | 0 | 0.0 | 0 | 0.0 |
| Failure to thrive | 0 | 0.0 | 0 | 0.0 | 0 | 0.0 | 1 | 6.7 | 0 | 0.0 |

IQR: Inter quartile range SD: Standard deviation

Tables (5 & 6) showed joint involvement predominantly among patients with Hemophilia A and B. The most common target joints in Hemophilia A patients included knee joints (50%), elbow joints (26.6%), followed by ankle joints (20.4%). Target joints were defined in our study as joints in which 3 or more consecutive bleeds occured within 6 consecutive months period (Blanchette VS et al. 2014) and/or radiologically according to CHESS study definition as a joint with chronic synovitis (synovial hypertrophy by MRI) regardless of explicit number of recent bleeds (Mulder et al, 2004).

Multiple joint combinations were also reported in 24.4% of Hemophilia A patients and 20% of Hemophilia B patients, which explains that the number of target joints was more than the number of patients presenting with target joints affection. No target joint involvement was reported in Fibrinogen disorders, Factor VII deficiency or rare coagulation disorder groups in this dataset.

# Supplementary Table S5: Distribution of the studied cases of Hemophilia A and B according to number of patients with target joints.

| **Target Joints number** | **Hemophilia A**  **(n=41 patients)** | | **Hemophilia B**  **(n=5 patients)** | |
| --- | --- | --- | --- | --- |
|  | **No.** | **%** | **No.** | **%** |
| **Single** | 31 | 75.6 | 4 | 80 |
| **Multiple** | 10 | 24.4 | 1 | 20 |

# Supplementary Table S6: Distribution of the studied cases according to types and number of target joints in Hemophilia A and B patients

| **Affected joints** | **Hemophilia A**  **(n=54 joints)** | | **Hemophilia B**  **(n=7 joints)** | |
| --- | --- | --- | --- | --- |
|  | **No.** | **%** | **No.** | **%** |
| **Knee** | 27 | 50.0 | 5 | 71.4 |
| **Elbow** | 16 | 29.6 | 1 | 14.3 |
| **Ankle** | 11 | 20.4 | 1 | 14.3 |

Supplementary Table S7 shows bleeding triggers and severity scores of some patients with inherited coagulation disorders.

Traumatic bleeding was universally reported across all groups (100%). Spontaneous bleeding was most frequent in Hemophilia A (53.1%), followed by Hemophilia B (43.7%), VII deficiency (40%), while it was much less common in other rare coagulation factors deficiency (33.3), and fibrinogen disorders (28.0%), reflecting variability in the severity and nature of bleeding tendencies.

Hemophilia A showed higher ISTH bleeding scores (8.64) and annual bleeding rates (5.95), reflecting its severe clinical course. Factor VII deficiency and fibrinogen disorders had a mean score of 8.0 and 7.24, respectively, while Hemophilia B and rare coagulation disorders exhibited slightly lower mean scores of 7.0 and 7.11respectively.

The Functional Independence Score of Hemophilia (FISH) in Hemophilia A and B was variable, ranging from 12 to 32 indicating a broader range of bleeding severity.

Hemophilia Joint Health Score (HJHS) was also widely variable among Hemophilia A and B patients, with mean values of 12.8 and 9.2 respectively.

HJHS was applied in this study for each joint, the score ranged (from 0-20) for the six joints involved in this scoring system (knees, elbows and ankles). Knowing that the higher the HJHS score becomes, the greater number of joints is affected. Although validated in hemophilia A and B, FISH and HJHS were applied in this cohort to patients with factor VII deficiency, afibrinogenemia and rare bleeding disorders with joint involvement as surrogate measures of joint health and functional status.

Supplementary Table S7: Bleeding triggers and severity scores of some patients with inherited coagulation disorders (n=129)

|  | **Diagnosis** | | | | | | | |  | |
| --- | --- | --- | --- | --- | --- | --- | --- | --- | --- | --- |
| **Hemophilia A (n = 64)** | | **Hemophilia B (n = 16)** | | **Fibrinogen disorders**  **(n = 25)** | | **Factor 7 deficiency**  **(n = 15)** | | **Rare**  **Coagulation**  **(n = 9)** | |
| **No.** | **%** | **No.** | **%** | **No.** | **%** | **No.** | **%** | **No.** | **%** |
| **Triggers of Bleeding**  Spontaneous | 34 | 53.1 | 7 | 43.7 | 7 | 28.0 | 6 | 40.0 | 3 | 33.3 |
| Traumatic | 64 | 100.0 | 16 | 100.0 | 25 | 100.0 | 15 | 100.0 | 9 | 100 |
| **ISTH score** Min. – Max. | 5.0 – 13.0 | | 5.0 – 12.0 | | 5.0 – 12.0 | | 5.0 – 13.0 | | 5.0 – 11.0 | |
| Mean ± SD. | 8.64 ± 2.19 | | 7.0 ± 2.22 | | 7.24 ± 1.85 | | 8.0 ± 2.17 | | 7.11 ± 2.15 | |
| Median (IQR) | 8.0 (7.0 – 10.50) | | 6.0 (5.50 – 8.0) | | 7.0 (6.0 – 8.0) | | 8.0 (7.0 – 9.0) | | 7.0 (5.0 – 9.0) | |
| **ABR**  Min. – Max. | 2.0 – 10.0 | | 2.0 – 8.0 | | 1.0 – 9.0 | | 2.0 – 9.0 | | 2.0 – 10.0 | |
| Mean ± SD. | 5.95 ± 2.13 | | 4.31 ± 2.06 | | 3.96 ± 2.17 | | 4.0 ± 2.14 | | 5.22 ± 2.59 | |
| Median (IQR) | 6.0 (4.0 – 8.0) | | 4.0 (2.50 –  5.50) | | 4.0 (2.0 – 5.0) | | 4.0 (2.0 – 4.0) | | 4.0 (4.0 – 7.0) | |
| **FISH score** |  | |  | |  | |  | |  | |
| Min-max  Mean ± SD  Median (IQR) | 12.0 – 32.0  22.1 ±6.3  24.0  (21.1 – 26.9) | | 12.0 - 32.0  23.2±6.9  25.0  (18.0 – 32.0) | | 27.0 - 32.0  27.9±0.33  28.0 | | 27.0 – 32.0  27.4±0.5  28.0 | | 27.0– 32.0  27.8±0.44  28.0 | |
| **HJHS score** |  | |  | |  | |  | |  | |
| Min-max  Mean ±SD  Median (IQR) | 0.0 – 24.0  12.8 ± 7.2  13.5  (6.8 – 19.3) | | 0.0 – 20.0  9.2 ± 7.2  7.5 ( 3.0 – 15.5) | | 0.0 – 10.0  1.3± 2.8 | | 0.0 – 10.0  1.4 ± 3.0 | | 0.0 – 10.0  2.2 ± 3.3 | |

Supplementary Tables S8A-S8B show frequency of complications among patients with inherited coagulation disorders.

Contractures were most frequent in Hemophilia A and B (29.7% and 31.2% respectively). Chronic hemophilic arthropathy was found in 64.1% of hemophilia A cases, and in 31.2% of hemophilia B cases.

Inhibitor formation was reported only in Hemophilia A patients, with 14.0% developing transient low-titer inhibitors and 17.2% developing persistent high-titer inhibitors, highlighting the immunological challenge in managing Hemophilia A.

Allergic reactions were reported in 23.4 % of Hemophilia A patients (classified into 12.5 % in patients who received Immunate, and 10.9% in those who received Cryoprecipitate) . Allergic reactions showed a minimal occurrence in fibrinogen patients receiving Cryoprecipitate (4.0%). Fresh frozen plasma related allergic reactions were reported in 18.6 % of Hemophilia B patients and in 6.7% of Factor VII deficiency patients who received it as an alternative treatment in emergency situations with limited access to specific factors replacement.

Among Hemophilia A patients, management adjustments included shifting 17.2% of patients to Emicizumab (Hemlibra) due to development of persistently high titer inhibitors, and 20.7% shifted from Immunate to Koate following allergic reactions to Immunate therapy. Cryoprecipitate was discontinued in a few patients (6.9% in Hemophilia A and 4.0% in fibrinogen disorders) in response to allergic reactions as well, shifting their treatment into specific factor concentrate.

A flowchart of complications and treatment outcomes in Hemophilia A and B patients is provided in Supplementary Figure S1.

# Supplementary Table S8A: Frequency of complications among patients with inherited coagulation disorders (n=129)

|  | | |  |  | | | | **Diagnosis** | |  | |  | |
| --- | --- | --- | --- | --- | --- | --- | --- | --- | --- | --- | --- | --- | --- |
| **Hemophilia A (n = 64)** | | **Hemophilia B (n = 16)** | | **Fibrinogen disorders**  **(n = 25)** | | **Factor 7 deficiency**  **(n = 15)** | | **Rare**  **Coagulation (n = 9)** | |
| **No.** | **%** | **No.** | **%** | **No.** | **%** | **No.** | **%** | **No.** | **%** |
| **Complications of the disease:**  Intracranial Hemorrhage | | |  | 5 | 7.8 | 0 | 0.0 | 0 | 0.0 | 3 | 20 | 1 | 11.1 |
| Contracture | | |  | 19  41 | 29.7  64.06 | 5  5 | 31.2  31.2 | 0  0 | 0.0  0.0 | 0    0 | 0.0    0.0 | 0    0 | 0.0    0.0 |
|  | Chronic |  |
| Hemophilic | |
| Arthropathy | |

Supplementary Table S8B: Treatment-related complications among patients with inherited coagulation disorders (n=129)

| **Treatment related complications:** |  | | | | **Diagnosis** | |  | |  | |
| --- | --- | --- | --- | --- | --- | --- | --- | --- | --- | --- |
| **Hemophilia A (n = 64)** | | **Hemophilia B (n = 16)** | | **Fibrinogen disorders**  **(n = 25)** | | **Factor 7 deficiency**  **(n = 15)** | | **Rare**  **Coagulation (n = 9)** | |
| **No.** | **%** | **No.** | **%** | **No.** | **%** | **No.** | **%** | **No.** | **%** |
| **Inhibitors to Factor**  **VIII concentrate**  Transient low titer | 9 | 14 |  |  |  |  |  |  |  |  |
| Persistent high titer | 11 | 17.2 |  |  |  |  |  |  |  |  |
| **Allergy** | 15 | 23.4 | 3 | 18.6 | 1 | 4.0 | 1 | 6.7 | 0 | 0.0 |

IQR: Inter quartile range SD: Standard deviation

Supplementary Figure S1: A flowchart of complications and treatment outcomes in Hemophilia A and B patients.

**Total number of Hemophilia Patients (Hemophilia A= 64, Hemophilia B= 16)**

**Inhibitors to Factor VIII concentrate in Hemophilia A patients :**

Transient low titre = 9

Persistent high titre =11

Allergy :

Hemophilia A = 15 Hemophilia B = 3

Joint bleeding: Target Joints:

Hemophilia A = 49 Hemophilia A : 41 patients (54 target joints)

Hemophilia B = 5 Hemophilia B : 5 patients (7 target joints)

Chronic Hemophilic Arthropathy:

Hemophilia A = 41

Hemophilia B = 5

Contracture:

Hemophilia A= 19

Hemophilia B = 5

Hemophilia B : 5\

Intracranial Hemorrhage:

Hemophilia A = 5

**Complications of the disease**

**Complications to treatment**

Supplementary Table S9 shows anthropometric measurements among patients with inherited coagulation disorders. The mean weight across all groups was relatively similar, ranging from 24.20 kg in fibrinogen disorders and Factor VII deficiency to 31.56 kg in rare coagulation disorders. Patients with hemophilia A and B had mean weights of 24.84 kg and 26.63 kg, respectively. The distribution showed considerable variability within groups as reflected by wide standard deviations.

Weight percentiles were generally within normal percentiles across most groups.

Mean height was fairly consistent across all groups, suggesting relatively normal linear growth across the cohorts. Height percentiles showed similar trends to weight percentiles, generally within normal percentiles for most groups.

Supplementary Table S9: Anthropometric measurements among patients with inherited coagulation disorders ( n=129)

|  | **Diagnosis** | | | | |
| --- | --- | --- | --- | --- | --- |
| **Hemophilia A (n = 64)** | **Hemophilia B (n = 16)** | **Fibrinogen disorders**  **(n = 25)** | **Factor 7 deficiency (n = 15)** | **Rare Coagulation (n = 9)** |
| **Weight (Kg)** Min. – Max. | 7.0 – 62.0 | 9.0 – 51.0 | 12.0 – 58.0 | 10.0 – 49.0 | 10.0 – 44.0 |
| Mean ± SD. | 24.84 ± 10.67 | 26.63 ± 13.14 | 24.20 ± 12.46 | 24.20 ± 11.23 | 31.56 ± 10.24 |
| Median (IQR) | 25.0 (16.0 – 32.0) | 19.0 (18.0 – 39.50) | 17.0 (15.0 – 32.0) | 20.0 (15.50 – 29.50) | 30.0 (29.0 – 40.0) |
| **Weight percentile** Min. – Max. | 5.0 – 99.0 | 11.0 – 66.0 | 12.0 – 76.0 | 9.0 – 63.0 | 9.0 – 95.0 |
| Mean ± SD. | 31.30 ± 16.80 | 31.88 ± 18.06 | 29.08 ± 17.34 | 28.87 ± 15.49 | 43.89 ± 23.36 |
| Median (IQR) | 30.0 (18.0 – 40.0) | 22.0 (20.0 – 50.50) | 19.0 (16.0 – 40.0) | 23.0 (17.0 – 36.50) | 37.0 (36.0 – 51.0) |
| **Height (cm)** Min. – Max. | 68.0 – 173.0 | 70.0 – 155.0 | 75.0 – 161.0 | 80.0 – 138.0 | 71.0 – 162.0 |
| Mean ± SD. | 113.2 ± 22.89 | 114.3 ± 24.31 | 115.7 ± 24.18 | 111.2 ± 16.74 | 122.4 ± 28.28 |
| Median (IQR) | 115.0 (96.50–129.5) | 114.5(97.50 –134.5) | 113.0 (98.0 – 132.0) | 110.0(102.5 – 122.5) | 135.0(119.0 –137.0) |
| **Height percentile** Min. – Max. | 12.0 – 99.0 | 2.0 – 99.0 | 16.0 – 74.0 | 20.0 – 58.0 | 14.0 – 75.0 |
| Mean ± SD. | 44.02 ± 17.59 | 46.44 ± 22.24 | 43.56 ± 16.16 | 40.47 ± 11.01 | 50.11 ± 20.72 |
| Median (IQR) | 46.0 (32.0 – 53.0) | 46.0 (36.0 – 60.0) | 42.0 (32.0 – 54.0) | 40.0 (34.50 – 48.0) | 57.0 (46.0 – 58.0) |

IQR: Inter quartile range SD: Standard deviation

Supplementary Table S10 shows laboratory data of patients with inherited coagulation disorders.

Hemoglobin levels were lowest in hemophilia A (10.05 g/dl).

Platelet counts were within normal limits in all groups, and none of the groups showed thrombocytopenia.

Leukocyte counts were largely normal across all groups, with means ranging from 6.68 ×10³/m in rare coagulation disorders to 8.46 ×10³/m in Hemophilia B. The results suggest no significant leukocytosis or leukopenia in the patients studied.

Marked prolongation of PT was observed in fibrinogen disorders (mean 32.51 sec), Factor VII deficiency (31.5 sec), and rare coagulation disorders (25.46 sec), while PT remained within near-normal ranges in Hemophilia A and B (around 13 sec), reflecting the specific coagulation defects involved.

APTT was markedly prolonged in Hemophilia A (mean 64.5 sec), fibrinogen disorders (60.4 sec), and rare coagulation disorders (69.48 sec), while it was moderately prolonged in Hemophilia B (53.9 sec) and nearly normal in Factor VII deficiency (40.05 sec), consistent with their underlying factor deficiencies.

# Supplementary Table S10: Laboratory data of patients with inherited coagulation disorders (n=129)

|  |  | **Diagnosis** | | | |
| --- | --- | --- | --- | --- | --- |
| **Hemophilia A (n = 64)** | **Hemophilia B (n = 16)** | **Fibrinogen disorders**  **(n = 25)** | **Factor 7 deficiency (n = 15)** | **Rare Coagulation (n = 9)** |
| **HGB (g/dl)** Min. – Max. | 7.0 – 13.80 | 7.50 – 13.0 | 8.0 – 13.10 | 7.90 – 13.10 | 7.50 – 11.90 |
| Mean ± SD. | 10.05 ± 1.54 | 11.23 ± 1.31 | 10.31 ± 1.15 | 11.35 ± 1.51 | 10.59 ± 1.32 |
| Median (IQR) | 10.0 (9.05 – 11.10) | 11.40(10.70 –12.05) | 10.20 (9.70 – 11.0) | 11.60(11.20– 12.05) | 11.0 (10.20 – 11.40) |
| **PLT count**  **(X10^3/m)**  Min. – Max. | 104.0 – 691.0 | 215.0 – 888.0 | 210.0 – 697.0 | 70.0 – 475.0 | 201.0 – 500.0 |
| Mean ± SD. | 339.6 ± 120.5 | 375.4 ± 154.7 | 396.2 ± 142.6 | 287.8 ± 99.15 | 362.8 ± 112.8 |
| Median (IQR) | 342.0(248.0–411.5) | 325.5(300.0 –416.0) | 391.0(252.0 –528.0) | 296.0(258.5 –321.5) | 411.0 (263.0 –445.0) |
| **TLC (X10^3/m)** Min. – Max. | 3.50 – 17.80 | 4.50 – 21.0 | 4.0 – 15.0 | 5.80 – 12.0 | 3.50 – 10.0 |
| Mean ± SD. | 7.93 ± 3.10 | 8.46 ± 4.19 | 8.29 ± 3.52 | 7.61 ± 1.54 | 6.68 ± 2.50 |
| Median (IQR) | 7.0 (6.0 – 9.50) | 7.65 (5.15 – 10.50) | 8.20 (5.0 – 10.0) | 7.20 (6.85 – 8.10) | 6.50 (6.85 – 8.10) |
| **PT (sec.)** Min. – Max. | 10.6 – 16.2 | 11.60 – 16.0 | 16.0 – 60.0 | 19.0 – 49.0 | 10.20 – 57.0 |
| Mean ± SD. | 13.2 ± 1.4 | 13.4 ± 1.3 | 32.51 ± 15.71 | 31.5 ± 9.3 | 25.46 ± 14.40 |
| Median (IQR) | 13.0 (12.10 – 14.50) | 13.40(12.20 –14.50) | 24.0 (16.0 – 44.0) | 31.7 (21.70 – 37.05) | 25.50 (15.0 – 27.80) |
| **APPT (sec.)** Min. – Max. | 41.0 – 122.0 | 44.0 – 70.0 | 45.0 – 120.0 | 33.20 – 42.0 | 34.0 – 120.0 |
| Mean ± SD. | 64.5 ± 18.81 | 53.9 ± 8.75 | 60.4 ± 15.8 | 40.05 ± 4.40 | 69.48 ± 33.19 |
| Median (IQR) | 61.50 (49.0 – 70.65) | 49.5 (39.0 – 59.50) | 52.0 (45.0 – 63.0) | 39.0 (36.50 – 49.20) | 57.30 (45.0 – 92.0) |

IQR: Inter quartile range SD: Standard deviation

HGB: Hemoglobin PLT count: Platelet Count

TLC: Total Leukocytic Count PT: Prothrombin Time

APPT: Activated Partial Prothrombin Time

Supplementary Table S11 illustrates specific factors levels among patients with inherited coagulation disorders. In Hemophilia A patients, Factor VIII levels were profoundly reduced, with a mean of 0.1% and values ranging from <1% to 32%, reflecting severe deficiency.

All Hemophilia B patients had reduced Factor IX levels (mean 3%, range <1%–5%), consistent with the diagnosis.

Patients with fibrinogen disorders had markedly reduced fibrinogen levels (mean 1.4%, range 0.2%–3%). Von Willebrand factor antigen levels were generally within normal limits across all groups. In patients with Factor VII deficiency, Factor VII levels ranged from 1.8% to 35%, with a mean of 35%, confirming the variable severity of this condition.

# Supplementary Table S11: Specific laboratory factors levels among studied patients with inherited coagulation disorders (n=129)

|  |  | **Diagnosis** | | | |
| --- | --- | --- | --- | --- | --- |
| **Hemophilia A**  **(n= 64)** | **Hemophilia B**  **(n= 16)** | **Fibrinogen disorders**  **(n= 25)** | **Factor 7 deficiency**  **(n = 15)** | **Rare Coagulation (n = 9)** |
| **VIII %** |  | **(n= 6)** |  | **(n= 3)** | **(n= 4)** |
| Min. – Max. | <1.0 % – 32% | 66.0 – 123.0 |  | 140.0 – 155.0 | 20.0 – 105.0 |
| Mean ± SD. | 0.1 ± 0.09 | 99.67 ± 26.30 |  | 147.3 ± 7.51 | 66.50 ± 35.01 |
| Median (IQR) | 0.6 | 110.0(67.0 – 122.0) |  | 147.0(143.5–151.0) | 70.50 (45.0 – 88.0) |
| **IX %** |  |  |  |  | **(n= 2)** |
| Min. – Max. |  | <1% – 5% |  |  | 70.0 – 74.0 |
| Mean ± SD. |  | 3 ± 1 |  |  | 72.0 ± 2.83 |
| Median (IQR) |  | 3 |  |  | 72.0 (70.0 – 74.0) |
| **Fibrinogen %** |  |  |  |  |  |
| Min. – Max. |  |  | 0.2% – 3% |  |  |
| Mean ± SD. |  |  | 1.4 ± 0.6 |  |  |
| Median (IQR) |  |  | 1.6 |  |  |
| **VW AG %** |  |  |  |  | **(n= 2)** |
| Min. – Max. |  |  |  |  | 66.0 – 79.0 |
| Mean ± SD. |  |  |  |  | 72.50 ± 9.19 |
| Median (IQR) |  |  |  |  | 72.50 (66.0 – 79.0) |
| **VW Activity %** Min. – Max. Mean ± SD.  Median (IQR)        **VII %**  Min – Max  Mean ± SD Median |  |  |  | **(n=15)**  1.8 - 35  35± 23  41.5 |  |

IQR: Inter quartile range SD: Standard deviation

NB: Coagulation profiles and factors assays in different rare coagulopathies:

*Factor 10 deficiency: 3 cases: -

Case 1: PT: 25.5 , APTT :65 , factor VII: 88% , factor V: 71% , and factor X: 5% Case 2: PT 26.7 , APTT: 60 , and factor X: 1%

Case 3: PT: 27.8 , APTT: 64 , and factor X: 11%

*Factor 5 deficiency: 2 cases:

Case 1: PT: 57 , APTT: 120 , factor VII: 122% , factor V: 6% , and factor X: 110%

Case 2: PT: 36 , APTT: 120 , factor II: 80% , factor V: 7% , and factor X: 76%

*Factor 11 deficiency: 2 cases:

| **Case 1**: PT: 15 , APTT: 92 | , and factor XI: 2% |
| --- | --- |
| **Case 2:** PT: 10.2 , APTT: 57.3 | , and factor XI: 1.8% |
|  |  |
| ***Factor 12 deficiency:** PT: 13.6 , | APTT: 45 , and factor XII: 6% |
| ***Factor 13 deficiency:** PT: 14.3 | , A PTT: 32 , and factor XIII: 18% |

Summary of imaging findings of significance that were performed for some patients indicated for imaging:

The imaging findings from this study revealed a chronic and complex musculoskeletal and neurological involvement consistent with a bleeding disorder, most commonly hemophilia. Multiple imaging modalities—including X-ray, CT, ultrasound, and MRI— consistently reported joint arthropathies, effusions, and hematomas affecting various joints, including the knee, elbow, ankle.

Hemarthrosis and synovial thickening were recurring findings, particularly in the knees and elbows, indicating repeated intra-articular bleeding and evolving joint damage.

HEAD scores of various joint ultrasounds and Denver scores of joints MRI are illustrated in tables (12 and 13)

Notably, central nervous system involvement was seen, with CT brain imaging documenting subdural hemorrhage in 5 patients with Hemophilia A and a patient with Factor XIII deficiency and intraventricular hemorrhage in a patient with Factor VII deficiency.

Additional findings in some patients included subcutaneous edema, increased vascularity, and signs of active colitis on abdominal imaging of a patient with Hemophilia A.

Renal involvement was noted by pelvi-abdominal ultrasound in a patient with Hemophilia B showing left kidney backpressure changes.

The cumulative radiologic profile reflects extensive complications from repeated bleeding episodes, underscoring the need for aggressive prophylactic hematologic therapy and multidisciplinary care to prevent further joint and neurological deterioration.

Supplementary Table S12: The MRI DENVER score of the target joints in Hemophilia A and B patients

|  | **Hemophilia A (n=54)** | | **Hemophilia B**  **(n=7)** | |
| --- | --- | --- | --- | --- |
| **Effusion** | **No.** | **%** | **No.** | **%** |
| Small | 32 | 59.3 | 4 | 57.1 |
| Moderate | 12 | 22.2 | 3 | 42.9 |
| Severe | 10 | 18.5 | 0 | 0.0 |
| **Synovial Hyperplasia** |  |  |  |  |
| Mild | 29 | 53.7 | 3 | 42.9 |
| Moderate | 14 | 25.9 | 4 | 57.1 |
| Severe | 11 | 20.4 | 0 | 0.0 |
| **Bony Erosions / cysts** |  |  |  |  |
| No | 30 | 55.6 | 2 | 28.5 |
| Partial | 14 | 25.9 | 5 | 71.4 |
| Complete | 10 | 18.5 | 0 | 0.0 |
| **Cartilage loss** |  |  |  |  |
| No | 30 | 55.6 | 2 | 28.5 |
| <50 | 11 | 20.4 | 5 | 71.4 |
| >50 | 13 | 24 | 0 | 0.0 |
| **Total Scores** |  |  |  |  |
| Min. – Max. | 3.0 – 10.0 |  | 3.0 -8.0 |  |
| Mean ± SD. | 6.5 ± 1.8 |  | 5.6±1.6 |  |
| Median (IQR) | 6 (4.5-7.5) |  | 6 (4.5-7.5) |  |

Supplementary Table S13: HEAD score of Ultrasound of the affected joints in Hemophilia A and B patients

|  | **Hemophilia A (n=54)** | | **Hemophilia B**  **(n=7)** | |
| --- | --- | --- | --- | --- |
| **Synovial Hypertrophy** | **No.** | **%** | **No.** | **%** |
| No | 32 | 59.3 | 4 | 57.1 |
| Mild- Moderate | 12 | 22.2 | 3 | 42.9 |
| Severe | 10 | 18.5 | 0 | 0.0 |
| **Cartilage Damage** |  |  |  |  |
| No | 35 | 64.8 | 4 | 57.1 |
| Mild | 19 | 35.2 | 3 | 42.9 |
| **Bony Erosions** |  |  |  |  |
| No | 40 | 74.0 | 5 | 71.4 |
| Mild | 14 | 25.9 | 2 | 28.5 |
| **Effusion** |  |  |  |  |
| No | 30 | 55.6 | 2 | 28.5 |
| Mild – Moderate | 11 | 20.4 | 5 | 71.4 |
| Severe | 13 | 24 | 0 | 0.0 |
| **Total Scores** |  | |  | |
| Min. – Max. | 1.0 – 3.0 | | 1.0 -2.0 | |
| Mean ± SD. | 2.0 ± 0.82 | | 1.5±0.5 | |
| Median (IQR) | 2 (1.5-2.5) | | 1.5 (1.0-2.0) | |

Supplementary Table S14 shows treatment modalities among studied patients with inherited coagulation disorders. All patients across all groups received tranexamic acid (TXA), except for rare coagulation disorders where 77.8% received TXA. Factor VIII concentrate was commonly used in Hemophilia A patients (98.4%), while Factor IX concentrate was given to all Hemophilia B patients (100%). Fibrinogen concentrate was administered only to patients with fibrinogen disorders (100%), reflecting targeted therapy. Fresh frozen plasma (FFP) was used universally in Hemophilia B (100%), widely in Factor VII deficiency (86.7%), and fibrinogen disorders (56.0%), but less in Hemophilia A (18.8%) and rarely in rare coagulation disorders. Cryoprecipitate was frequently used in Hemophilia A (48.4%) and fibrinogen disorders (60.0%), but minimally or not at all in other groups. Factor VII concentrate was administered to all patients with Factor VII deficiency (100%) and to a smaller proportion of Hemophilia A patients (17.2%). Emicizumab (Hemlibra) was used in 17.2% of Hemophilia A patients only.

The longest mean duration of replacement therapy was seen in Hemophilia A (6.13 ± 3.49 years), reflecting early onset and chronic nature of treatment. Other groups showed shorter durations, ranging from 4.07 to 5.12 years on average, with rare coagulation disorders having a median duration similar to Hemophilia A (6.0 years).

All patients across all groups received on-demand treatment. Prophylactic treatment schedules varied, where 45 patients with Hemophilia A (70.3%) received prophylactic therapy, either factor or non-factor replacement. For non-factor replacement therapy (Emicizumab), all patients were on bi-weekly regimen. Hemophilia B and Fibrinogen disorders patients received once-weekly prophylaxis in 56.3% and 40% respectively. Prophylactic treatment was less common among Factor VII deficiency (13.3% once weekly, 6.7% twice weekly).

Patients with Factor VII deficiency receiving prophylactic doses of Factor VII had a history of intracranial hemorrhage. A patient with Factor V deficiency had a history of intracranial hemorrhage, thus received regular doses of fresh frozen plasma and another patient with Factor XIII deficiency received Cryoprecipitate regularly for the same reason.

Supplementary Table S14: Treatment modalities among studied patients with inherited coagulation disorders (n=129)

|  | **Diagnosis** | | | | | | | | | | |
| --- | --- | --- | --- | --- | --- | --- | --- | --- | --- | --- | --- |
| **Hemophilia A (n = 64)** | | **Hemophilia B (n = 16)** | | | **Fibrinogen disorders**  **(n = 25)** | | **Factor 7 deficiency**  **(n = 15)** | | **Rare**  **Coagulation (n = 9)** | |
| **No.** | **%** | **No.** | | **%** | **No.** | **%** | **No.** | **%** | **No.** | **%** |
| **Product** TXA | 64 | 100 | 16 | | 100 | 25 | 100 | 15 | 100 | 7 | 77.8 |
| Cryoprecipitate | 31 | 48.4 | 0 | | 0.0 | 15 | 60.0 | 0 | 0.0 | 1 | 11.1 |
| Fibrinogen | 0 | 0.0 | 0 | | 0.0 | 25 | 100.0 | 0 | 0.0 | 0 | 0.0 |
| FFP | 12 | 18.8 | 16 | | 100 | 14 | 56.0 | 13 | 86.7 | 1 | 11.1 |
| F VIII | 63 | 98.4 | 0 | | 0.0 | 0 | 0.0 | 0 | 0.0 | 0 | 0.0 |
| F IX | 0 | 0.0 | 16 | | 100.0 | 0 | 0.0 | 0 | 0.0 | 0 | 0.0 |
| F VII | 11 | 17.2 | 0 | | 0.0 | 0 | 0.0 | 15 | 100 | 0 | 0.0 |
| Emicuzimab | 11 | 17.2 | 0 | | 0.0 | 0 | 0.0 | 0 | 0.0 | 0 | 0.0 |
| **Duration (years)** Min. – Max. | 0.50 – 14.0 | | 0.50 – 11.0 | | | 0.50 – 12.0 | | 2.0 – 9.0 | | 0.50 – 11.0 | |
| Mean ± SD. | 6.13 ± 3.49 | | 4.47 ± 3.01 | | | 5.12 ± 3.70 | | 4.07 ± 2.34 | | 4.83 ± 3.34 | |
| Median (IQR) | 6.0 (4.0 – 8.0) | | 4.0 (2.0 – 6.0) | | | 4.0 (2.0 – 8.0) | | 3.0(2.0 – 5.50) | | 6.0 (2.0 – 6.0) | |
| **Type**  On-demand | 64 | 100.0 | 16 | | 100.0 | 25 | 100.0 | 15 | 100.0 | 9 | 100.0 |
| Prophylactic:     | Factor |  | | --- | --- | | Non-factor (Emicuzimab) | |   Frequency of prophylaxis:  1/W | 34  11        15 | 53.2  17.2        23.4 | 9  0          9 | | 56.3  0.0        56.3 | 10  0        10 | 40.0  0.0        40.0 | 3  0        2 | 20.0  0.0        13.3 | 2  0      2 | 22.2  0.0          22.22 |
| 2/W | 30 | 46.9 | 0 | 0 | 0.0 | 0 | 0.0 | 1 | 6.7 | 0 | 0.0 |

IQR: Inter quartile range SD: Standard deviation

FFP: Fresh Frozen Plasma F VII, VIII and IX: Factor VII, VIII, IX concentrates 1/w: Once per week 2/w : Twice per week.

1. Comparative analysis:

Supplementary Table S15 shows a global comparison between inherited coagulation disorders studied cases. The male predominance in hemophilia A and B is sharply contrasting with mixed gender distribution in other groups. (P= 0.35). Consanguinity rates are significantly higher in fibrinogen disorders than in other groups (P=0.16).

Supplementary Table S15: Comparison between various Inherited Coagulation Disorders as regards Demographic data

| Variable | Hemophilia A (n=64) | Hemophilia B (n=16) | Fibrinogen Disorders (n=25) | Factor VII Deficiency (n=15) | P-value* |
| --- | --- | --- | --- | --- | --- |
|  | | | | | |
| Age (years)  Mean ± SD | 6.86 ± 3.56 | 6.49 ± 3.04 | 6.30 ± 3.74 | 6.27 ± 2.66 | 0.89 |
| Gender (Male)  n (%) | 64 (100%) | 16 (100%) | 13 (52.0%) | 5 (33.3%) | 0.35 |
| Consanguinity (+)  n (%) | 26 (40.6%) | 7 (43.8%) | 15 (60.0%) | 4 (26.7%) | 0.16 |

*P-value<0.05 is statistically significant; P-values calculated using Kruskal-Wallis test for continuous variables, Fisher's Exact test for categorical variables. Gender comparison excludes hemophilia groups due to X-linked inheritance.

Supplementary Table S16 shows comparisons between inherited coagulation disorders studied cases regarding bleeding triggers and scores. Spontaneous bleeding was most frequent in hemophilia A and B followed by other groups. (P= 0.13). ISTH bleeding score and ABR were highest in hemophilia A (P= 0.02 and 0.00 respectively).

Supplementary Table S16: Comparison between various Inherited Coagulation Disorders as regards Bleeding Severity, ABR and ISTH Scores

| Variable | Hemophilia A (n=64) | Hemophilia B (n=16) | Fibrinogen (n=25) | Factor VII (n=15) | P-value* |
| --- | --- | --- | --- | --- | --- |
| Bleeding Severity | | | | | |
| ISTH Score | 8.64 ± 2.19 | 7.0 ± 2.22 | 7.24 ± 1.85 | 8.0 ± 2.17 | 0.02 |
| ABR | 5.95 ± 2.13 | 4.31 ± 2.06 | 3.96 ± 2.17 | 4.0 ± 2.14 | 0.00 |
| Spontaneous bleeding | 34 (53.1%) | 7 (43.7%) | 7 (28.0%) | 6 (40.0%) | 0.13 |

*P-value<0.05 is statistically significant

ABR: Annual bleeding rate

Supplementary Table S17 shows comparison between different inherited coagulation disorders studied cases regarding frequency of complications. Intracranial hemorrhage was most frequent in factor VII deficiency cases followed by factor V deficiency and hemophilia A, and absent in the rest of groups (P= 0.07).

Chronic hemophilic arthropathy was more frequent in hemophilia A than hemophilia B (P < 0.00).

Supplementary Table S17: Comparison between various Inherited Coagulation Disorders as regards Frequency of Complications

| Variable | Hemophilia A (n=64) | Hemophilia B (n=16) | Fibrinogen (n=25) | Factor VII (n=15) | P-value* |
| --- | --- | --- | --- | --- | --- |
| Clinical Complications | | | | | |
| ICH | 5 (7.8%) | 0 (0%) | 0 (0%) | 3 (20.0%) | 0.07 |
| Chronic Hemophilic Arthropathy | 41 (64.1%) | 5 (31.3%) | 0 (0%) | 0 (0%) | <0.00 |
| Target joints | 41 (64.1%) | 5 (31.3%) | 3 (12.0%) | 3 (20.0%) | < 0.00 |

*P-value<0.05 is statistically significant

ICH: Intracranial hemorrhage

Supplementary Table S18 shows comparisons between inherited coagulation disorders studied cases regarding laboratory findings. Hemoglobin level was lowest in patients in hemophilia A patients (P= 0.01). Platelet counts were normal across all groups (P= 0.20). Prothrombin time was normal in hemophilia A and B and prolonged in the rest of groups (P< 0.00). Activated partial thromboplastin time was normal in factor VII deficiency and prolonged in the rest of groups (P< 0.00).

Supplementary Table S18: Comparison between various Inherited Coagulation Disorders as regards laboratory results:

| Variable | Hemophilia A (n=64) | Hemophilia B (n=16) | Fibrinogen (n=25) | Factor VII (n=15) | P-value* |
| --- | --- | --- | --- | --- | --- |
| Laboratory Parameters | | | | | |
| Hemoglobin (g/dl) | 10.05 ± 1.54 | 11.23 ± 1.31 | 10.31 ± 1.15 | 11.35 ± 1.51 | 0.01 |
| Platelet count (×10³/μL) | 339.6 ± 120.5 | 375.4 ± 154.7 | 396.2 ± 142.6 | 287.8 ± 99.2 | 0.20 |
| PT (seconds) | 13.2 ± 1.4 | 13.4 ± 1.3 | 32.5 ± 15.7 | 31.5 ± 9.3 | < 0.00 |
| APTT (seconds) | 64.5 ± 18.8 | 53.9 ± 8.8 | 60.4 ± 15.8 | 40.1 ± 4.4 | < 0.00 |

* P-value<0.05 is statistically significant

P-values calculated using Kruskal-Wallis test for continuous variables, Fisher's Exact test for categorical variables.

Supplementary Table S19 shows comparisons between key clinical observations about hemophilia A and B. Hemophilia A consistently demonstrated greater severity than Hemophilia B across multiple parameters, with significantly higher ABR (P = 0.01), ISTH bleeding scores (8.64 vs 7.0, p = 0.01), lower hemoglobin levels (10.05 vs 11.23 g/dl, p = 0.01) and longer APTT (P= 0.00), supporting the clinical impression of more aggressive bleeding and joint complications.

Supplementary Table S19: Comparisons between hemophilia A and B

| Variable | Hemophilia A (n=64) (Mean ± SD) | Hemophilia B (n=16) (Mean ± SD) | p-value* |
| --- | --- | --- | --- |
| Age (years) | 6.86 ± 3.56 | 6.49 ± 3.04 | 0.68 |
| Age at first bleeding (months) | 7.5 ± 12.0 | 23.4 ± 23.5 | 0.02 |
| Age at diagnosis (years) | 1.28 ± 1.98 | 2.46 ± 2.34 | 0.08 |
| Duration of disease (years) | 6.13 ± 3.49 | 4.47 ± 3.01 | 0.07 |
| ISTH score | 8.64 ± 2.19 | 7.0 ± 2.22 | 0.01 |
| Annual bleeding rate | 5.95 ± 2.13 | 4.31 ± 2.06 | 0.01 |
| FISH score | 22.1 ± 6.3 | 23.2 ± 6,9 | 0.57 |
| HJHS score | 12.8 ± 7.2 | 9.2 ± 7.2 | 0.09 |
| Hemoglobin (g/dl) | 10.05 ± 1.54 g/dl | 11.23 ± 1.31 g/dl | 0.01 |
| APTT (sec) | 64.5 ± 18.81 | 53.9 ± 8.75 | 0.00 |

*Significance level: p < 0.05 considered statistically significant.

Tests applied: Independent-sample t-test (approximation using mean ± SD and n values).

Supplementary Table S20: Comparisons between severe and moderate Hemophilia A

| **Variable** | **Severe hemophilia A (n=34)**  **(Mean ± SD)** | **Moderate hemophilia A (n=19)**  **(Mean ± SD)** | **P-value*** |
| --- | --- | --- | --- |
| **Age (years)** | 6.50±4.09 | 8.00±3.92 | 0.32 |
| **Duration of disease (years)** | 5.89±3.83 | 6.45±4.37 | 0.70 |
| **ISTH-BAT score** | 9.27±2.43 | 9.91±2.39 | 0.44 |
| **FISH score** | 30.77±1.31 | 30.73±1.01 | 0.98 |
| **HJHS** | 7.27±5.72 | 6.82±5.60 | 0.92 |
| **Annual Bleeding Rate (ABR)** | 6.91±2.31 | 6.73±2.00 | 0.83 |
| **Frequency of hospitalization** | 6.91±2.31 | 7.00±1.89 | 0.91 |

*Significance level: p < 0.05 considered statistically significant.

Tests used: Independent t-test and Mann–Whitney U.

Supplementary Table S20 shows comparisons between key clinical observations among patients with severe and moderate hemophilia A. There were no statistically significant differences across all studied parameters.

Correlative analysis:

In Supplementary Table S21 and Supplementary Figure S2, the correlation analysis identifies functional status (FISH score) as the strongest predictor of target joint development, emphasizing the importance of maintaining physical function in hemophilia management. The significant correlations with bleeding parameters (ABR, ISTH score) and hemoglobin levels confirm that bleeding control is crucial for joint preservation.

The moderate correlations (r =0.35-0.43) suggest these factors explain approximately 12-18% of the variance in target joint development, indicating that while important, other unmeasured factors also contribute significantly to joint outcomes. The lack of correlation with age suggests that target joint development is more related to disease activity than simple duration of disease.

These findings support proactive prophylaxis strategies focused on maintaining functional status and preventing bleeding episodes to minimize long-term joint complications in hemophilia A patients.

Supplementary Table S21: Correlation Between Hemophilia A risk factors and target joint development

| Risk Factor | Correlation (r) | 95% CI | P-value |
| --- | --- | --- | --- |
| FISH Functional Score | -0.430 | -0.611 to -0.206 | < 0.00 |
| Annual Bleeding Rate (ABR) | 0.390 | 0.159 to 0.580 | < 0.01 |
| Hemoglobin Level (g/dl) | -0.383 | -0.575 to -0.151 | < 0.01 |
| ISTH Bleeding Score | 0.353 | 0.117 to 0.551 | < 0.01 |
| HJHS Joint Score | 0.250 | 0.004 to 0.467 | < 0.05 |
| Disease Severity (1-3) | 0.230 | -0.017 to 0.450 | 0.07 |
| Consanguinity | 0.180 | -0.069 to 0.408 | 0.15 |
| Family History | 0.160 | -0.089 to 0.390 | 0.21 |
| Age (years) | -0.006 | -0.251 to 0.240 | 0.96 |

Correlation analysis using Pearson correlation coefficients with 95% confidence intervals calculated using Fisher's z-transformation. Bold entries indicate statistically significant correlations (p < 0.05).


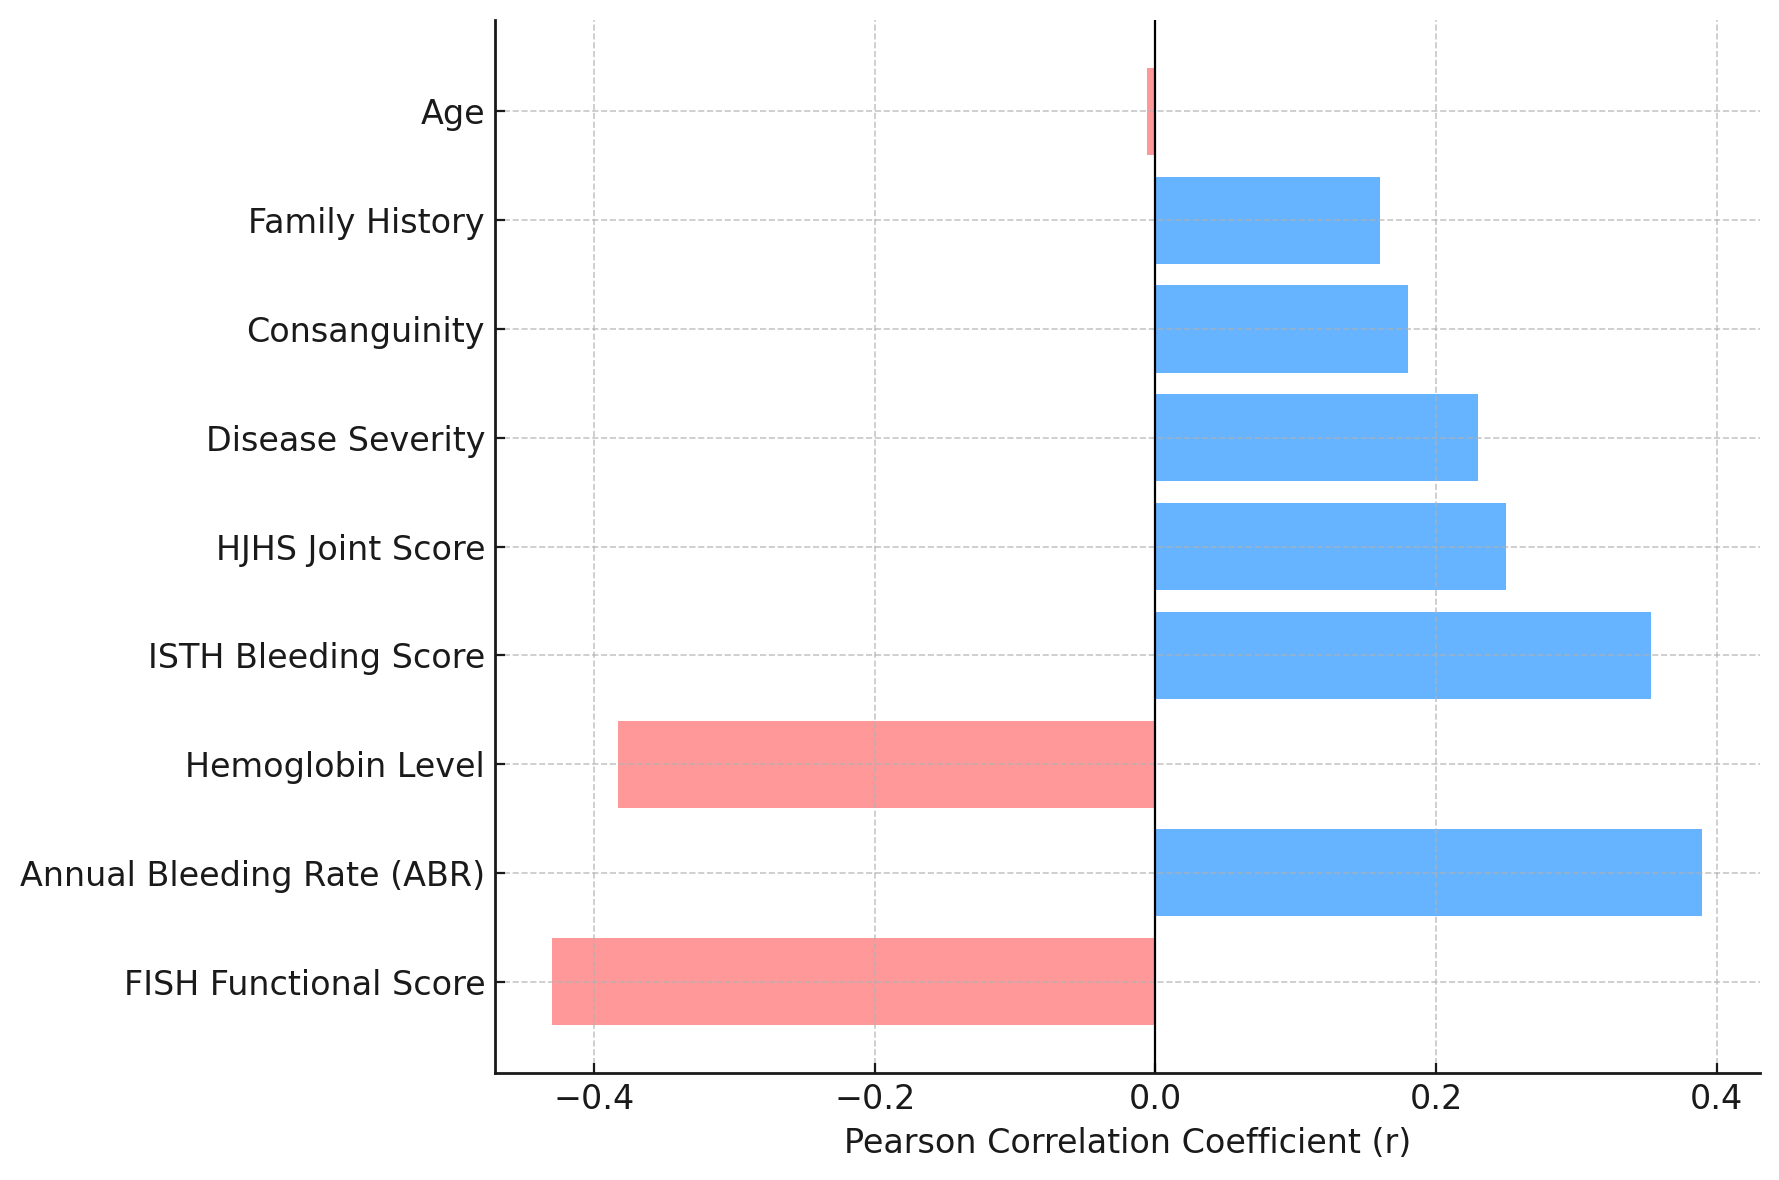


Supplementary Figure S2: Horizontal bar chart of the correlations between hemophilia A risk factors and target joint development.

Supplementary Table S22 shows the ROC analysis revealing FISH functional score as the best single predictor of target joint development (AUC = 0.715(. The optimal cutoff of ≤26 provides a practical threshold for clinical decision-making with 73.2% sensitivity and 69.6% specificity. Annual bleeding rate emerges as the second-best predictor (AUC = 0.695) with an optimal cutoff of >6 episodes/year. Disease severity shows limited discriminatory ability (AUC = 0.615). Age demonstrates no predictive value (AUC = 0.503).

Supplementary Table S22: ROC Analysis Hemophilia A risk factors for predicting chronic hemophilic arthropathy development

| Risk Factor | AUC | 95% CI | Optimal Cutoff | Sensitivity | Specificity | PPV | NPV | P-value |
| --- | --- | --- | --- | --- | --- | --- | --- | --- |
| FISH Score | 0.715 | 0.598-0.832 | ≤ 26 | 73.2% | 69.6% | 75.6% | 66.7% | < 0.00 |
| Annual Bleeding Rate | 0.695 | 0.571-0.819 | > 6 | 65.9% | 73.9% | 75.0% | 64.2% | < 0.01 |
| Hemoglobin Level | 0.691 | 0.567-0.815 | ≤ 10.0 g/dl | 68.3% | 69.6% | 73.7% | 64.0% | < 0.01 |
| ISTH Bleeding Score | 0.676 | 0.549-0.803 | > 8 | 61.0% | 73.9% | 73.5% | 61.8% | < 0.05 |
| HJHS Joint Score | 0.625 | 0.493-0.757 | > 20 | 58.5% | 65.2% | 68.6% | 55.6% | > 0.05 |
| Age | 0.503 | 0.370-0.636 | > 7 years | 51.2% | 56.5% | 61.8% | 45.6% | > 0.05 |
| Disease Severity | 0.615 | 0.481-0.749 | Severe | 82.9% | 43.5% | 69.4% | 62.5% | > 0.05 |
